# Supplementary material for: Hydrophobic dispersion-derived Si/rGO nanocomposites in SiOC ceramic matrix as anode materials for high performance lithium-ion batteries
Source: Royal Society of Chemistry journal article supplement (doi:10.1039/d3ta02641h), 2023-01-01
Supplement: d3ta02641h1.pdf [file d3ta02641h1.pdf]

## **Electronic Supplementary Information**

# **Hydrophobic Dispersion-derived Si/rGO Nanocomposites in SiOC Ceramic Matrix as Anode Materials for High Performance Lithium-Ion Batteries**

Minkyong Ku<sup>a</sup>, Dohyub Park<sup>a</sup>, Minjun Kim<sup>a</sup>, Minsu Choi<sup>a</sup>, Wonchang Choi<sup>a\*</sup>

<sup>a</sup>Department of Energy Engineering, Konkuk University, 120, Neungdong-ro, Gwangjin-gu, Seoul 05029, Republic of Korea

\*Corresponding author Tel.: +82 2-2049-6051

E-mail address: [wchoi@konkuk.ac.kr](mailto:wchoi@konkuk.ac.kr) (Prof. W. Choi)

**Calculation for the composition (weight ratio) of each material in both composites based on TGA analysis results.**

Assuming that the Si content is (x), the SiOC content is (1-x), and the rGO content is (y), the composition ratio of each material is calculated as follows.

[Si/SiOC composite]

$$109.17x + 59.9(1 - x) = 68.5$$

$$49.27x = 8.6$$

$$x = 0.1745$$

Si: 17.5 wt.% / SiOC: 82.5 wt.%

[Si/rGO/SiOC composite]

$$1) 109.17x + 59.9(1 - x) = 69.4$$

$$49.27x = 9.5$$

$$x = 0.1928$$

2) 0.1928 (x) :y = 94 :6

$$y = 0.0123$$

Si: 19.3 wt.% / rGO: 1.23 wt.% / SiOC: 79.47 wt.%

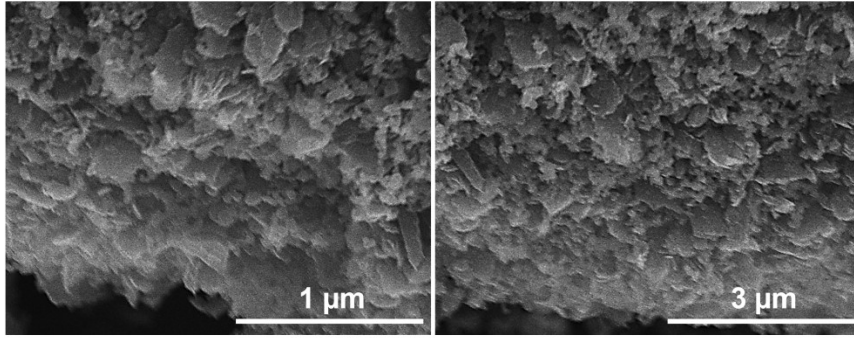

**Fig. S1** FE-SEM images of TA-containing Si/rGO composite

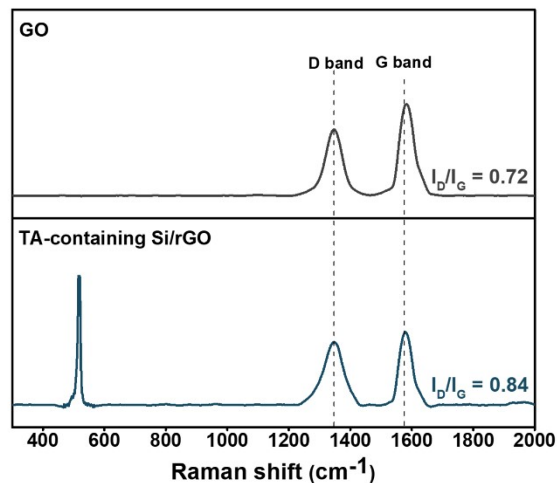

**Fig. S2** Raman spectra of GO and TA-containing Si/rGO composite

In Fig. S2, TA-containing Si/rGO in this study exhibits an increased  $I_D/I_G$ , as compared to that of GO material. This result indicates that oxygen functional groups are removed to form atomic vacancies and decrease in  $sp^2$  carbon domains, suggesting that GO was successfully reduced by TA.<sup>1,2</sup>

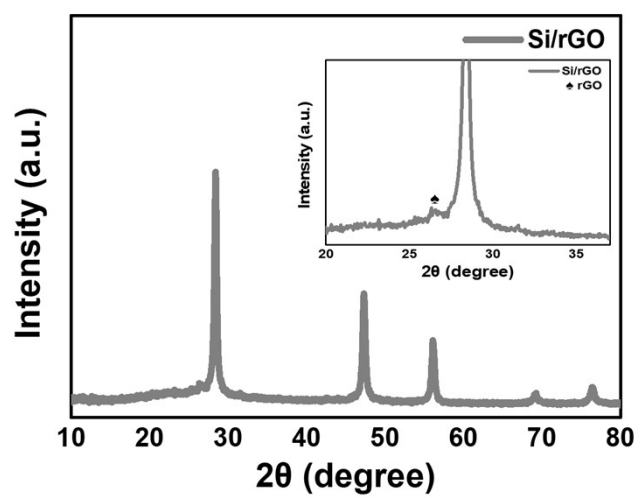

**Fig. S3** XRD pattern of Si/rGO composite

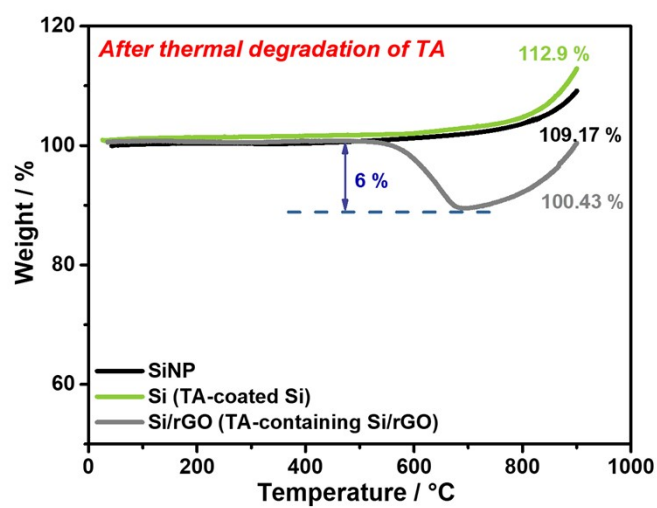

**Fig. S4** TGA curves of SiNP, Si (TA-coated Si), and Si/rGO (TA-containing Si/rGO) after pyrolysis process in an inert gas atmosphere

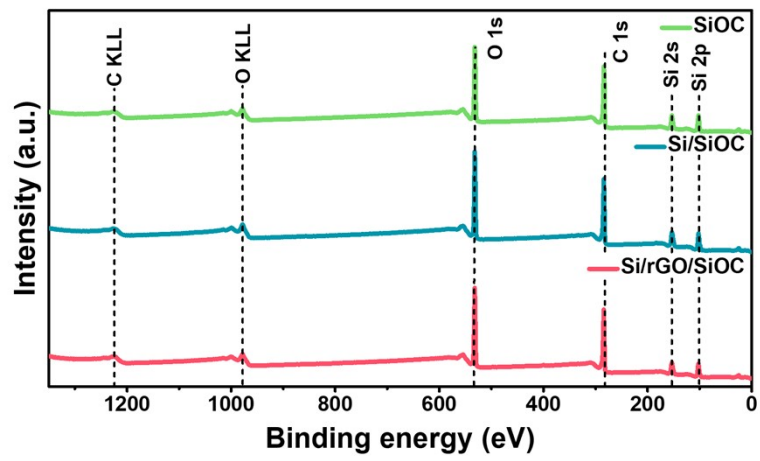

**Fig. S5** XPS survey spectra of SiOC, Si/SiOC, and Si/rGO/SiOC composites

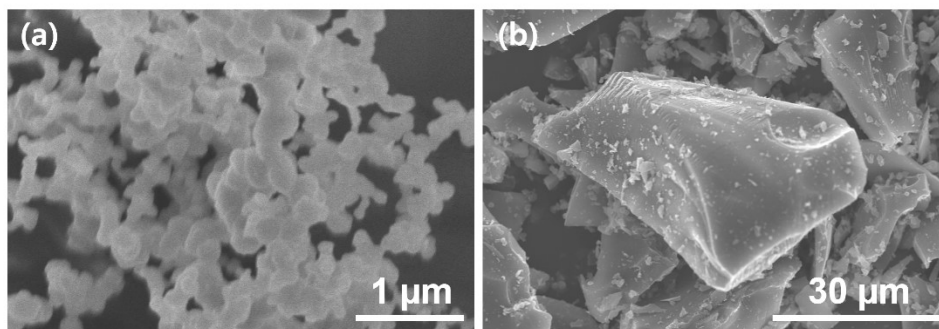

**Fig. S6** FE-SEM images of: (a) SiNP and (b) SiOC



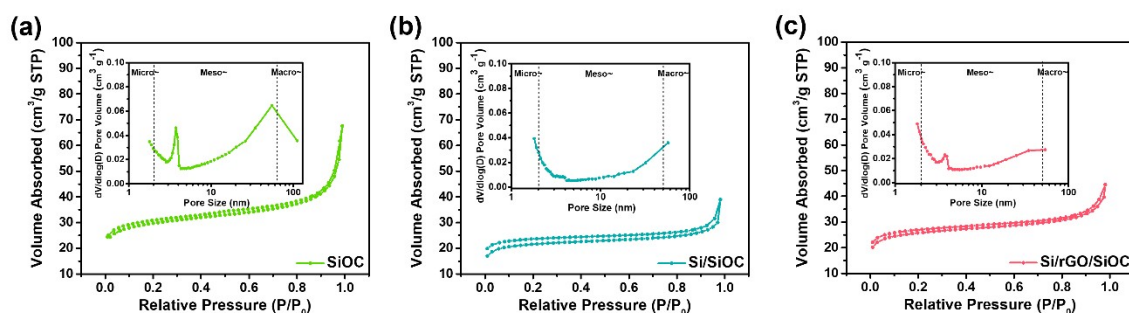

**Fig. S7** Nitrogen adsorption – desorption isotherm and corresponding pore size distribution (inset) of the (a) SiOC, (b) Si/SiOC, and (c) Si/rGO/SiOC

BET analysis was performed for SiOC, Si/SiOC, and Si/rGO/SiOC samples, and the measurement information is summarized in Table S1. All samples show mesoporous characteristics corresponding to a type IV isotherm curve. The Si/rGO/SiOC sample exhibits a relatively high surface area ( $92.82 \text{ m}^2 \text{ g}^{-1}$ ) and pore volume ( $0.035 \text{ cm}^3 \text{ g}^{-1}$ ), as compared to those of Si/SiOC, possibly owing to the large surface area of rGO.

**Table S1.** BET analysis results of the SiOC, Si/SiOC, and Si/rGO/SiOC

| Sample      | BET Surface Area<br>( $\text{m}^2 \text{ g}^{-1}$ ) | Total pore volume<br>( $\text{cm}^3 \text{ g}^{-1}$ ) | BJH Average pore size<br>(nm) |
|-------------|-----------------------------------------------------|-------------------------------------------------------|-------------------------------|
| SiOC        | 110.88                                              | 0.066                                                 | 10.8                          |
| Si/SiOC     | 81.59                                               | 0.026                                                 | 6.54                          |
| Si/rGO/SiOC | 96.82                                               | 0.035                                                 | 6.76                          |

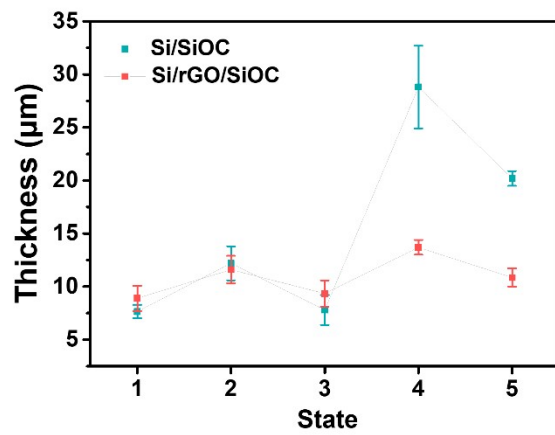

**Fig. S8** Thickness of electrodes in each state of Si/SiOC and Si/rGO/SiOC electrodes

**Table S2.** Fitting values of Si/SiOC and Si/rGO/SiOC electrodes after 1 cycle and 100 cycles

|             | After 1 cycle      |                        |                       | After 100 cycles   |                        |                       |
|-------------|--------------------|------------------------|-----------------------|--------------------|------------------------|-----------------------|
|             | $R_s$ ( $\Omega$ ) | $R_{SEI}$ ( $\Omega$ ) | $R_{ct}$ ( $\Omega$ ) | $R_s$ ( $\Omega$ ) | $R_{SEI}$ ( $\Omega$ ) | $R_{ct}$ ( $\Omega$ ) |
| Si/SiOC     | 1.612              | 2.858                  | 49.93                 | 1.761              | 42.7                   | 213.5                 |
| Si/rGO/SiOC | 1.524              | 1.182                  | 33.94                 | 2.07               | 3.5                    | 33.39                 |

## References

1. Y.-B. Kwon, S.-H. Go, C. Choi, T. H. Seo, B. Yang, M. W. Lee and Y.-K. Kim, *Diamond and Related Materials*, 2021, **119**.
2. Y. Lei, Z. Tang, R. Liao and B. Guo, *Green Chemistry*, 2011, **13**.
